# Supplementary material for: Redox control of GPx catalytic activity through mediating self-assembly of Fmoc-phenylalanine selenide into switchable supramolecular architectures
Source: Royal Society of Chemistry journal article supplement (doi:10.1039/c4sm02030h), 2014-10-13
Supplement: c4sm02030h1.pdf [file c4sm02030h1.pdf]

## Supplementary Information

### **Redox control of GPx catalytic activity through mediating self-assembly of Fmoc-phenylalanine selenide into switchable supramolecular architectures**

Zupeng Huang,<sup>a</sup> Quan Luo,<sup>a</sup> Shuwen Guan,<sup>b</sup> Jianxiong Gao,<sup>c</sup> Yongguo Wang,<sup>a</sup> Bo Zhang,<sup>a</sup>  
Liang Wang,<sup>a</sup> Jiayun Xu,<sup>a</sup> Zeyuan Dong<sup>\*a</sup> and Junqiu Liu<sup>\*a</sup>

<sup>\*</sup>Corresponding authors. Tel.: + 86-431-8516 8452; Fax: +86-431-8519 3421

E-mail address: junqiuliu@jlu.edu.cn; zdong@jlu.edu.cn

## Syntheses and characterizations

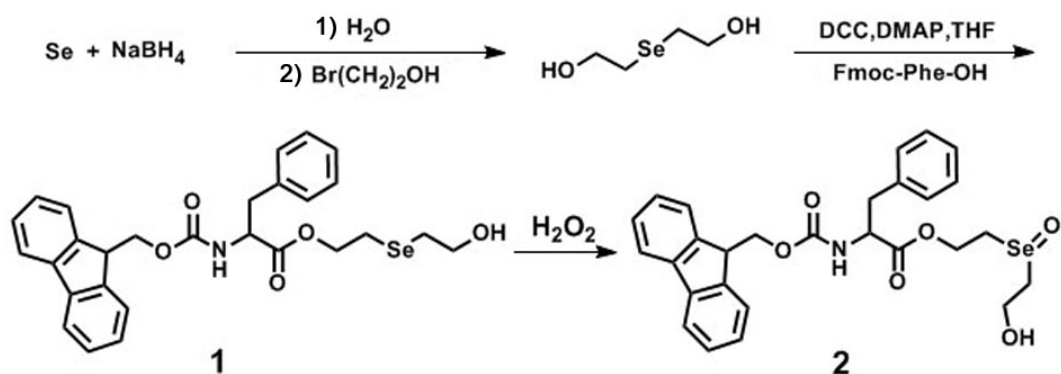

**Scheme S1.** Synthesis route of compounds **1** and **2**

**Synthesis and characterization of 2,2'-selenodiethanol:** To a round-bottom flask containing selenium powder (789.5 mg, 10 mmol) and NaBH<sub>4</sub> (1.894 g, 50 mmol) under a nitrogen atmosphere, 10 mL of H<sub>2</sub>O was injected. The suspension was heated until NaBH<sub>4</sub> had completely reacted. After the mixture had been cooled down to room temperature, deoxygenized 2-bromoethanol (2.505 g, 20 mmol) was added. The mixture was then stirred over night. The solution was extracted with EtOAc, and the organic layers were dried over anhydrous Na<sub>2</sub>SO<sub>4</sub>. After filtration, the solvent was removed by vacuum. The resulting crude product was purified by flash chromatography (10:1 EtOAc : petroleum ether) to yield the product as a yellow liquid, total yield 35%. <sup>1</sup>H NMR (500 MHz, DMSO-d<sub>6</sub>, 25 °C) δ(ppm): 2.22 (s, 1H), 2.84 (t, 3H), 3.85 (t, 2H).

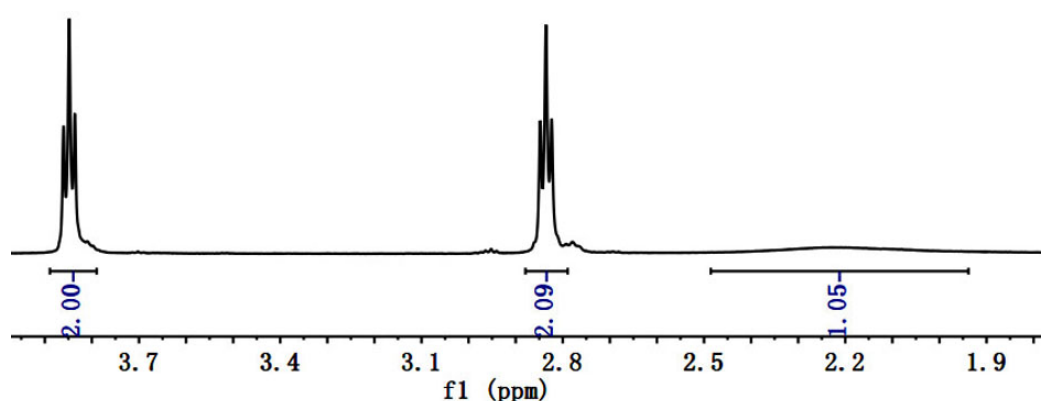

**Figure S1.** <sup>1</sup>H NMR spectrum of 2, 2'-selenodiethanol in CDCl<sub>3</sub>.

## Characterization of Compound 1

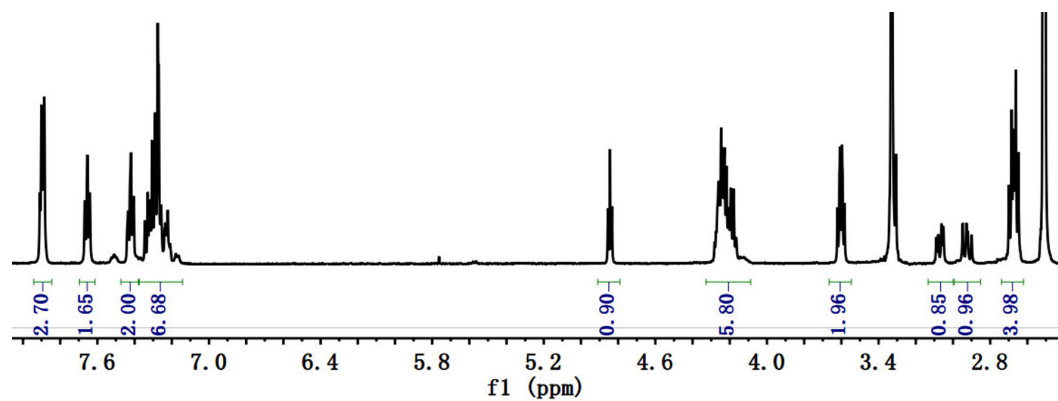

Figure S2. <sup>1</sup>H NMR spectrum of compound 1 in DMSO-d<sub>6</sub>.

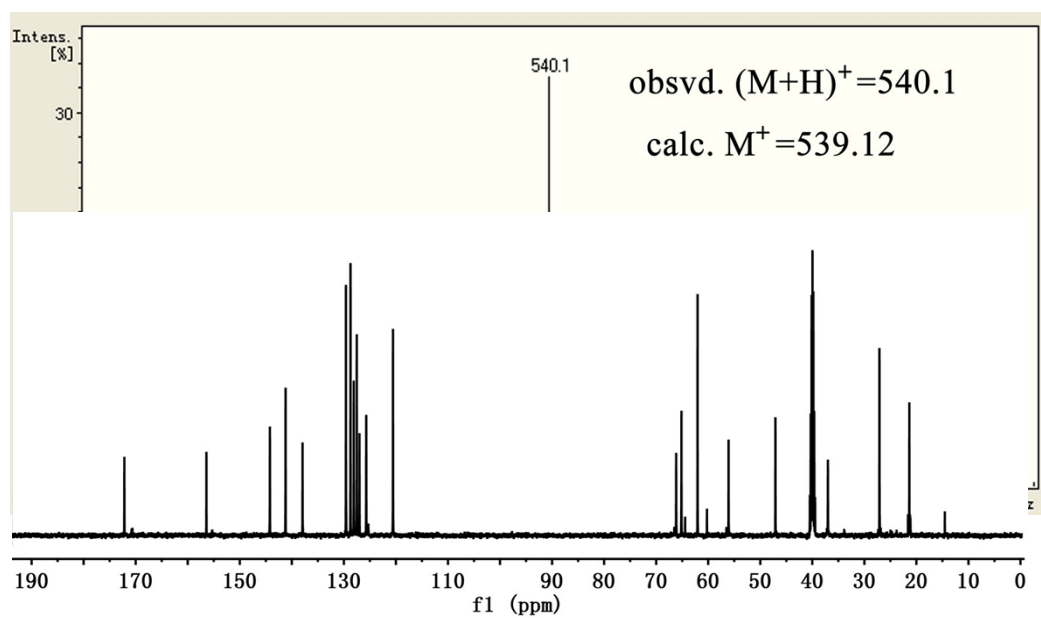

Figure S4. <sup>13</sup>C NMR spectrum of compound 1 in DMSO-d<sub>6</sub>.

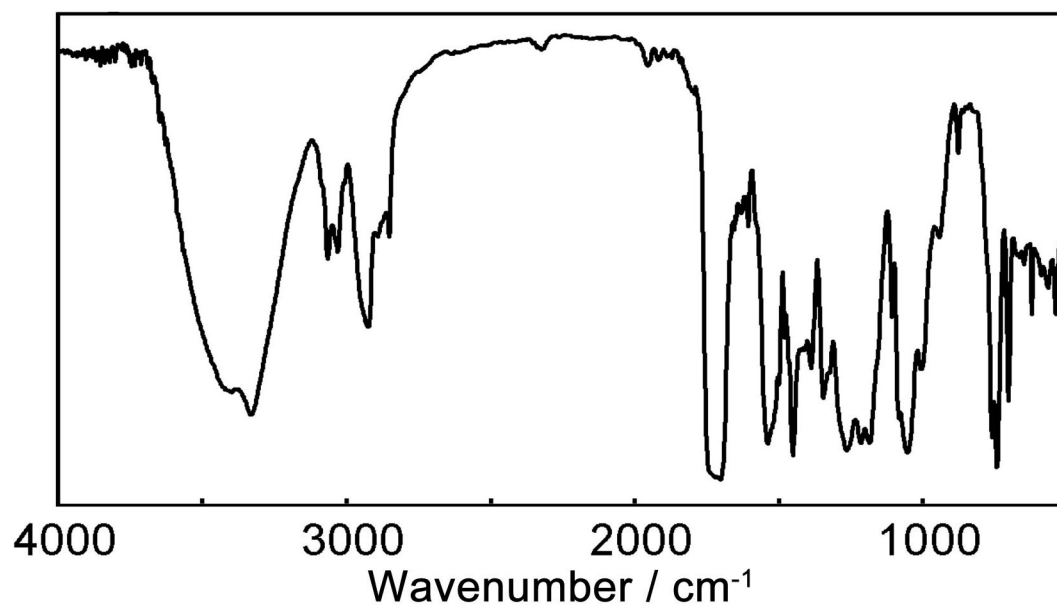

Figure S5. FT-IR spectrum of compound 1.

#### Characterization of Compound 2

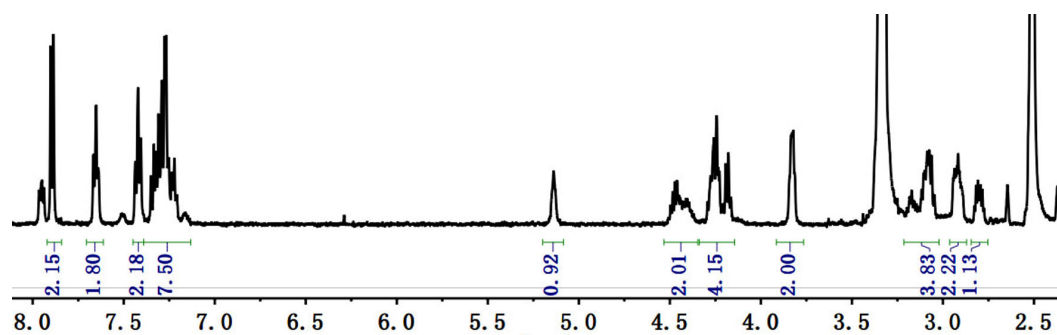

Figure S6. <sup>1</sup>H NMR spectrum of compound 2 in DMSO-d<sub>6</sub>.

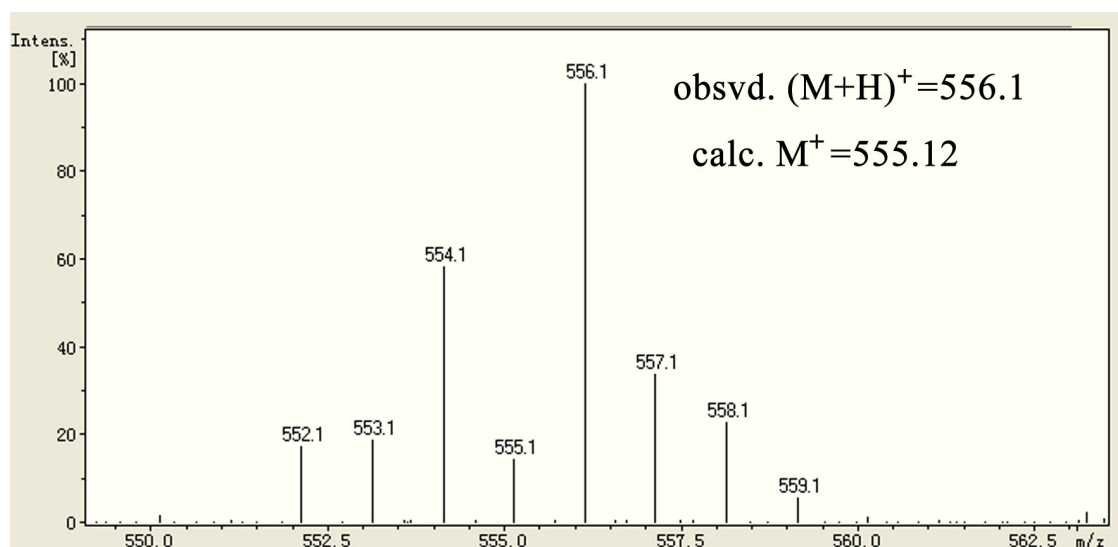

Figure S7. ESI-MS of compound 2.

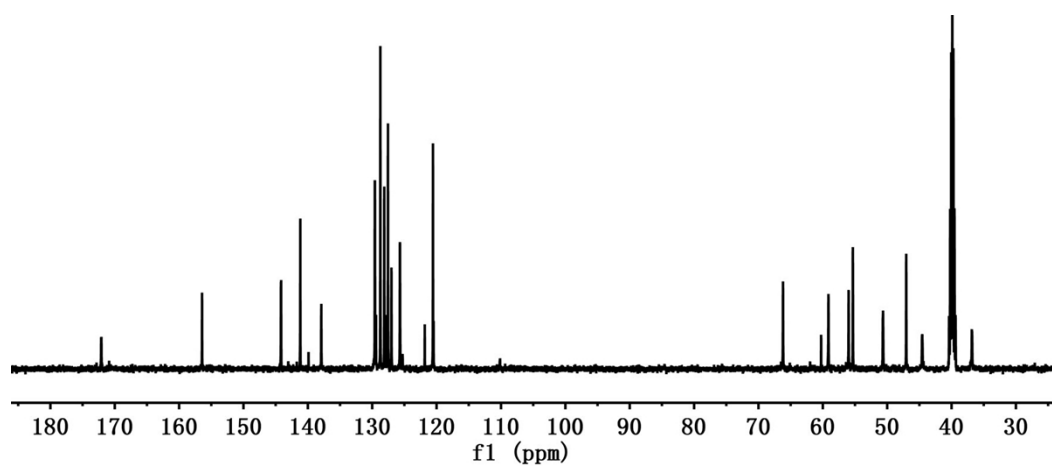

**Figure S8.**  $^{13}\text{C}$  NMR spectrum of compound 2 in DMSO- $\text{d}_6$ .

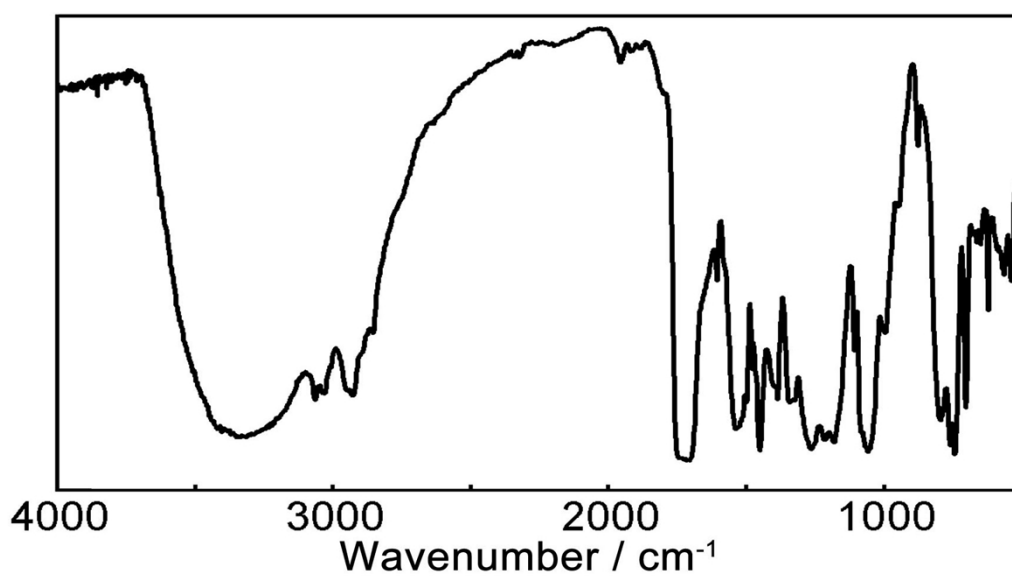

**Figure S9.** FT-IR spectrum of compound 2.

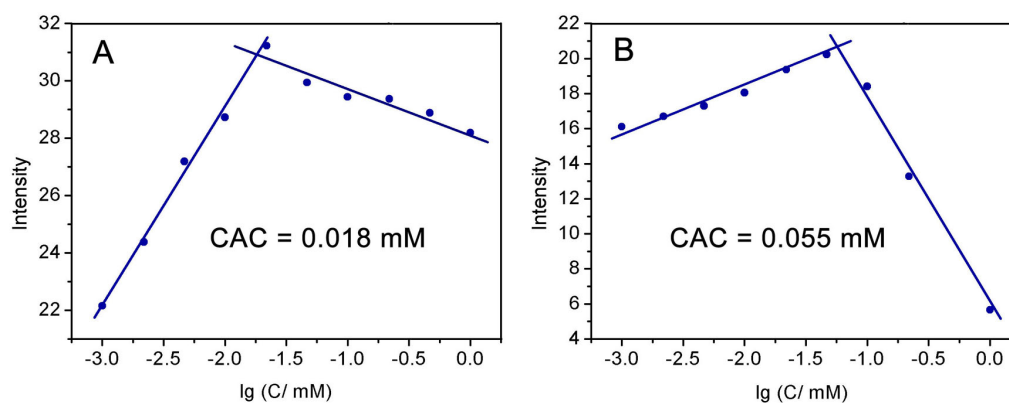

**Figure S10.** CAC determination of (A) compound 1 and (B) compound 2.

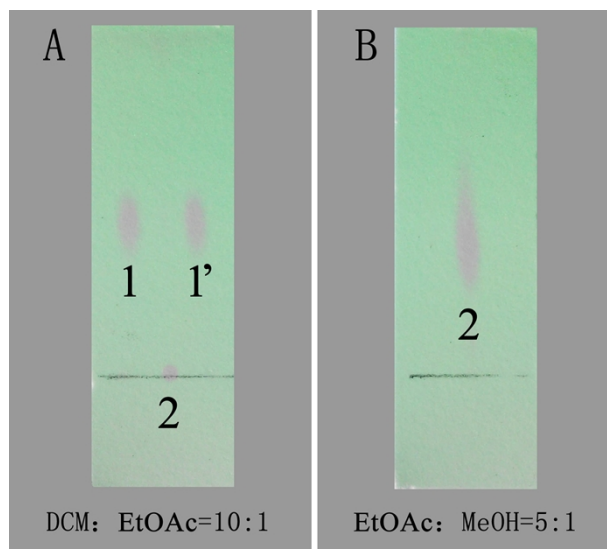

**Figure S11.** TLC of compound **1** and **2**. (A) After the addition of 2 equiv. of  $\text{H}_2\text{O}_2$  to the methanol solution of **1**, **2** is obtained. The treatment of **2** with 2 equiv. of GSH produces **1'**, whose  $R_f$  value is the same with that of **1**, implying the reversible conversion between **1** and **2**. (B) The produced **2** can be eluted by polarer developing solvent. No obvious impurity points can be observed in both A and B indicates the conversion is almost quantitative.

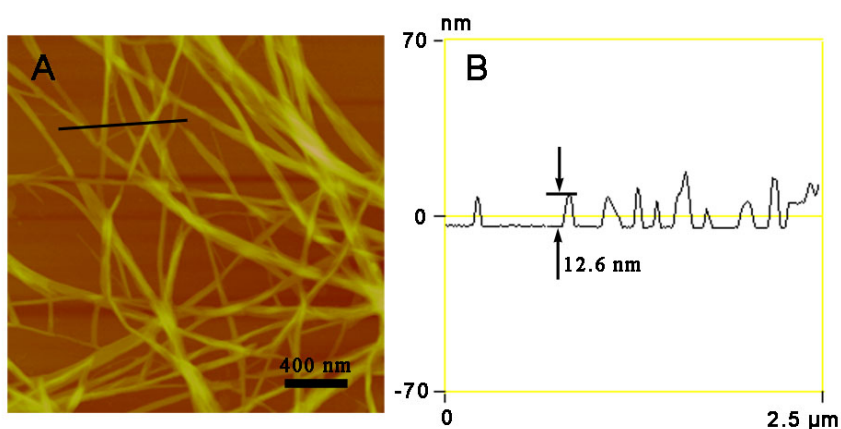

**Figure S12.** (A) AFM image of the NTs self-assembled from compound **2** in aqueous solution at concentration of 1 mM. (B) Height curve of the NTs from panel A.

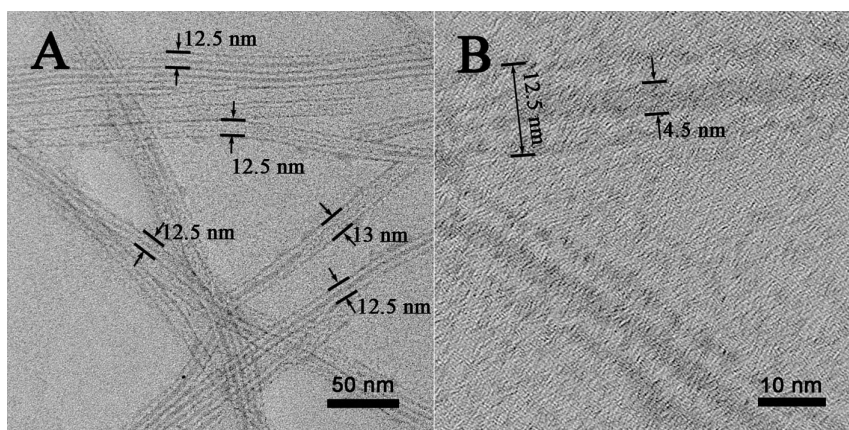

**Figure S13.** (A) TEM and (B) HR-TEM images of the NTs self-assembled from compound **2** in aqueous solution at concentration of 1 mM.

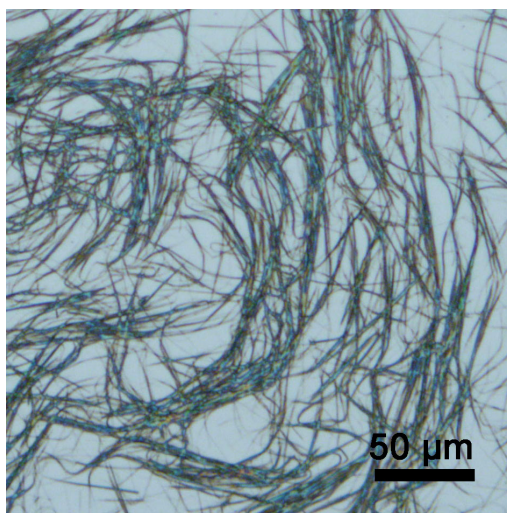

**Figure S14.** Optical microscopy image of the NTs self-assembled from compound **2** in aqueous solution at concentration of 1 mM.

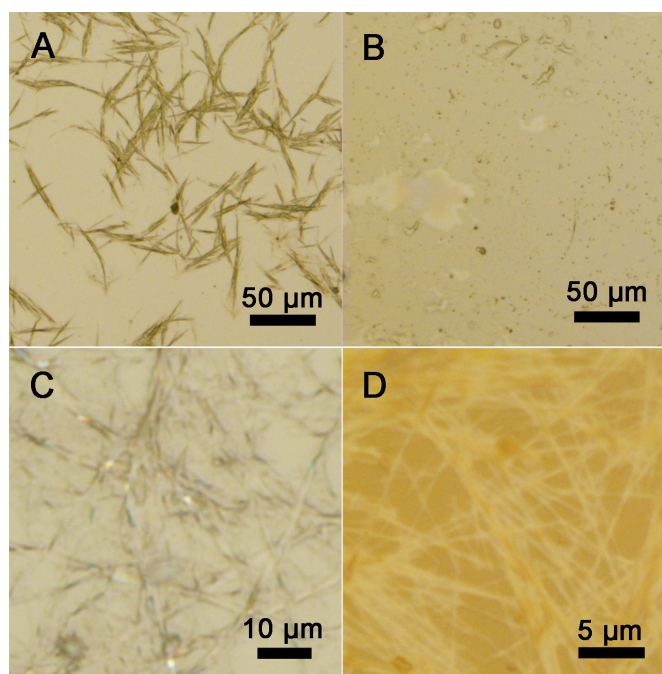

**Figure S15.** Optical microscopic pictures of the self-assemblies. (A) NTs self-assembled from compound **2** at 1 mM. (B) After addition of 2 equiv. of GSH to the solution of A. (C) After addition of 10 equiv. of  $\text{H}_2\text{O}_2$  to the solution of B. (D) After addition of 1 equiv. of  $\text{CUOOH}$  to the solution of B.



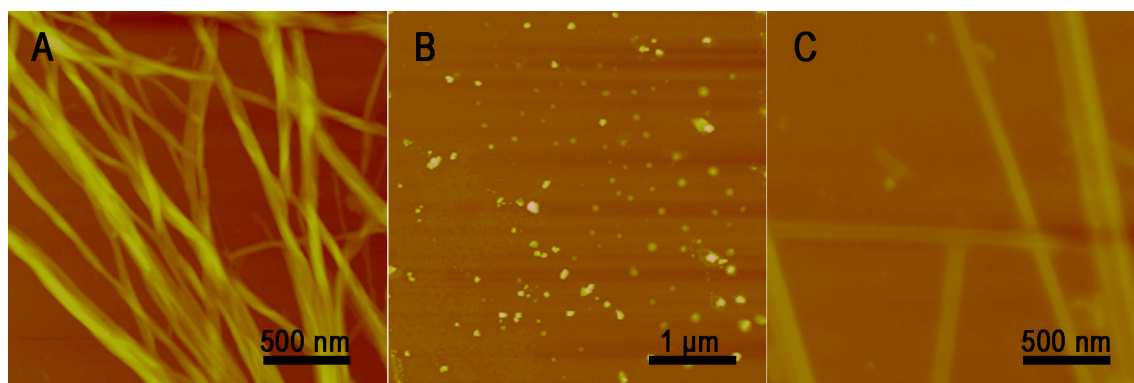

**Figure S16.** AFM images of the self-assemblies. (A) NTs self-assembled from compound **2** at 1 mM. (B) After addition of 2 equiv. of GSH to the solution of A. (C) After addition of 1 equiv. of CUOOH to the solution of B.

**Table S1** The activities for the reduction of ROOH (250 μM) by GSH (1.0 mM) in the presence of catalysts at pH 7.0 (50 mM PBS) and 37 °C.

| ROOH                          | Catalyst <sup>a</sup> | Activity <sup>b</sup><br>(μM min <sup>-1</sup> μmol <sup>-1</sup> ) |
|-------------------------------|-----------------------|---------------------------------------------------------------------|
| CUOOH                         | NSs                   | 0.00284                                                             |
|                               | NTs                   | 0.108                                                               |
| H <sub>2</sub> O <sub>2</sub> | NSs                   | Not detected                                                        |
|                               | NTs                   | 0.059                                                               |

<sup>a</sup> The initial rate of reaction was corrected for the spontaneous oxidation.

<sup>b</sup> The concentration of catalysts was 0.2 mM.
